# Supplementary material for: The Influence of Reducing Disease Activity Score on Cervical Spine Deformity in Rheumatoid Arthritis: A Systematic Review
Source: Hindawi journal article supplement (doi:10.1155/2022/9403883), 2022-01-01
Supplement: f1 [file 9403883.f1.pdf]

## Appendix: Search String

### PubMed

<http://www.ncbi.nlm.nih.gov/pubmed?otool=leiden>

results: 69

((("Arthritis, Rheumatoid"[Mesh:noexp] OR "rheumatoid arthritis"[tw] OR "rheumatoid"[tw] OR "rheumatic"[tw] OR "arthritis"[tw] OR arthriti\*[tw] OR "RA"[tiab]) AND ("Cervical Vertebrae"[mesh] OR cervical\*[tw] OR "Cervical Vertebrae/abnormalities"[Mesh] OR "SAS"[tw] OR "subaxilar subluxation"[tw] OR "subaxilar subluxations"[tw] OR "subaxial subluxation"[tw] OR "subaxial subluxations"[tw] OR "AAI"[tw] OR "atlanto axial impaction"[tw] OR "atlantoaxial impaction"[tw] OR "AAS"[tw] OR "anterior atlantoaxial subluxation"[tw] OR "anterior atlanto axial subluxation"[tw] OR "anterior atlantoaxial subluxations"[tw] OR "anterior atlanto axial subluxations"[tw] OR "VT"[tw] OR "vertical translocation"[tw] OR "vertical translation"[tw] OR "vertical translocations"[tw] OR "vertical translations"[tw]) AND ("das28"[tw] OR "das 28"[tw] OR "das28 score"[tw] OR "das28 scored"[tw] OR "das28 scores"[tw] OR "das28 value"[tw] OR "das28 values"[tw] OR "das 28 score"[tw] OR "das 28 scores"[tw] OR "das 28 values"[tw] OR "disease activity score 28"[tw] OR "disease activity"[tw] OR "disease activities"[tw] OR "disease active"[tw] OR "diseases activities"[tw] OR "diseases activity"[tw] OR "illness activity"[tw] OR "Severity of Illness Index"[mesh]) AND ("Time"[mesh] OR "time"[tw] OR time\*[tw] OR timing\*[tw] OR "long term"[tw] OR "longterm"[tw] OR "short term"[tw] OR "shortterm"[tw] OR followup\*[tw] OR "follow up"[tw] OR "Follow-Up Studies"[mesh]))

### Archivalia

((("Arthritis, Rheumatoid"[Mesh:noexp] OR "rheumatoid arthritis"[tw] OR "rheumatoid"[tw] OR rheumat\*[tw] OR "arthritis"[tw] OR arthriti\*[tw] OR "RA"[tiab]) AND (((("Cervical Vertebrae"[mesh] OR cervical\*[tw]) AND ("deformities"[tw] OR "deformity"[tw] OR "Spinal Curvatures"[Mesh] OR "spinal curvatures"[tw] OR "spinal curvature"[tw] OR "spine curvatures"[tw] OR "spine curvature"[tw])) OR "Cervical Vertebrae/abnormalities"[Mesh] OR "SAS"[tw] OR "subaxilar subluxation"[tw] OR "subaxilar subluxations"[tw] OR "subaxial subluxation"[tw] OR "subaxial subluxations"[tw] OR "AAI"[tw] OR "atlanto axial impaction"[tw] OR "atlantoaxial impaction"[tw] OR "AAS"[tw] OR "anterior atlantoaxial subluxation"[tw] OR "anterior atlanto axial subluxation"[tw] OR "anterior atlantoaxial subluxations"[tw] OR "anterior atlanto axial subluxations"[tw] OR "VT"[tw] OR

"vertical translocation"[tw] OR "vertical translation"[tw] OR "vertical translocations"[tw] OR "vertical translations"[tw]) AND ("das28 score"[tw] OR "das28 scored"[tw] OR "das28 scores"[tw] OR "das28 value"[tw] OR "das28 values"[tw] OR "das 28 score"[tw] OR "das 28 scores"[tw] OR "das 28 values"[tw] OR "disease activity score 28"[tw] OR "disease activity"[tw] OR "disease activities"[tw] OR "disease active"[tw] OR "diseases activities"[tw] OR "diseases activity"[tw] OR "illness activity"[tw]))

((("Arthritis, Rheumatoid"[Mesh:noexp] OR "rheumatoid arthritis"[tw] OR "rheumatoid"[tw] OR rheumat\*[tw] OR "arthritis"[tw] OR arthriti\*[tw] OR "RA"[tiab]) AND (((("Cervical Vertebrae"[mesh] OR cervical\*[tw]) AND ("deformities"[tw] OR "deformity"[tw] OR "Spinal Curvatures"[Mesh] OR "spinal curvatures"[tw] OR "spinal curvature"[tw] OR "spine curvatures"[tw] OR "spine curvature"[tw])) OR "Cervical Vertebrae/abnormalities"[Mesh] OR "SAS"[tw] OR "subaxilar subluxation"[tw] OR "subaxilar subluxations"[tw] OR "subaxial subluxation"[tw] OR "subaxial subluxations"[tw] OR "AAI"[tw] OR "atlanto axial impaction"[tw] OR "atlantoaxial impaction"[tw] OR "AAS"[tw] OR "anterior atlantoaxial subluxation"[tw] OR "anterior atlanto axial subluxation"[tw] OR "anterior atlantoaxial subluxations"[tw] OR "anterior atlanto axial subluxations"[tw] OR "VT"[tw] OR "vertical translocation"[tw] OR "vertical translation"[tw] OR "vertical translocations"[tw] OR "vertical translations"[tw]))

## **MEDLINE**

<http://gateway.ovid.com/ovidweb.cgi?T=JS&MODE=ovid&NEWS=n&PAGE=main&D=prmz>

## **Embase**

<http://ovidsp.ovid.com/ovidweb.cgi?T=JS&PAGE=main&MODE=ovid&D=oomezd>

((("Rheumatoid Arthritis"/ OR "rheumatoid arthritis".mp OR "rheumatoid".mp OR "rheumatic".mp OR "arthritis".mp OR arthriti\*.mp OR "RA".ti,ab) AND (exp "Cervical Vertebra"/ OR cervical\*.mp OR "SAS".mp OR "subaxilar subluxation".mp OR "subaxilar subluxations".mp OR "subaxial subluxation".mp OR "subaxial subluxations".mp OR "AAI".mp OR "atlanto axial impaction".mp OR "atlantoaxial impaction".mp OR "AAS".mp OR "atlantoaxial subluxation"/ OR "anterior atlantoaxial subluxation".mp OR "anterior atlanto axial subluxation".mp OR "anterior atlantoaxial subluxations".mp OR "anterior atlanto axial subluxations".mp OR "VT".mp OR "vertical

translocation".mp OR "vertical translation".mp OR "vertical translocations".mp OR "vertical translations".mp) AND ("DAS28"/ OR "DAS28".mp OR "DAS 28".mp OR "das28 score".mp OR "das28 scored".mp OR "das28 scores".mp OR "das28 value".mp OR "das28 values".mp OR "das 28 score".mp OR "das 28 scores".mp OR "das 28 values".mp OR "disease activity score"/ OR "disease activity score 28".mp OR "disease activity".mp OR (exp "Disease activity"/ AND exp "Scoring System"/) OR "disease activities".mp OR "disease active".mp OR "diseases activities".mp OR "diseases activity".mp OR "illness activity".mp OR "Severity of Illness Index"/) AND (exp "Time"/ OR "time".mp OR time\*.mp OR timing\*.mp OR "long term".mp OR "longterm".mp OR "short term".mp OR "shortterm".mp OR followup\*.mp OR "follow up".mp OR "Follow Up"/))

## Web of Science

<http://isiknowledge.com/wos>

(ti=("Rheumatoid Arthritis" OR "rheumatoid arthritis" OR "rheumatoid" OR "rheumatic" OR "arthritis" OR arthriti\* OR "RA") AND ts=("Cervical Vertebra" OR cervical\* OR "SAS" OR "subaxilar subluxation" OR "subaxilar subluxations" OR "subaxial subluxation" OR "subaxial subluxations" OR "AAI" OR "atlanto axial impaction" OR "atlantoaxial impaction" OR "AAS" OR "atlantoaxial subluxation" OR "anterior atlantoaxial subluxation" OR "anterior atlanto axial subluxation" OR "anterior atlantoaxial subluxations" OR "anterior atlanto axial subluxations" OR "VT" OR "vertical translocation" OR "vertical translation" OR "vertical translocations" OR "vertical translations") AND ts=("DAS28" OR "DAS28" OR "DAS 28" OR "das28 score" OR "das28 scored" OR "das28 scores" OR "das28 value" OR "das28 values" OR "das 28 score" OR "das 28 scores" OR "das 28 values" OR "disease activity score" OR "disease activity score 28" OR "disease activity" OR ("Disease activity" AND "Scoring System") OR "disease activities" OR "disease active" OR "diseases activities" OR "diseases activity" OR "illness activity" OR "Severity of Illness Index") AND ts=("Time" OR "time" OR time\* OR timing\* OR "long term" OR "longterm" OR "short term" OR "shortterm" OR followup\* OR "follow up" OR "Follow Up")) OR (ts=("Rheumatoid Arthritis" OR "rheumatoid arthritis" OR "rheumatoid" OR "rheumatic" OR "arthritis" OR arthriti\* OR "RA") AND ti=("Cervical Vertebra" OR cervical\* OR "SAS" OR "subaxilar subluxation" OR "subaxilar subluxations" OR "subaxial subluxation" OR "subaxial subluxations" OR "AAI" OR "atlanto axial impaction" OR "atlantoaxial impaction" OR "AAS" OR "atlantoaxial subluxation" OR "anterior atlantoaxial subluxation" OR "anterior atlanto axial subluxation" OR "anterior atlantoaxial subluxations" OR "anterior atlanto axial subluxations" OR "VT" OR "vertical translocation" OR "vertical translation" OR "vertical translocations" OR "vertical translations") AND ts=("DAS28" OR "DAS28" OR "DAS 28" OR "das28 score" OR "das28 scored" OR

"das28 scores" OR "das28 value" OR "das28 values" OR "das 28 score" OR "das 28 scores" OR "das 28 values" OR "disease activity score" OR "disease activity score 28" OR "disease activity" OR ("Disease activity" AND "Scoring System") OR "disease activities" OR "disease active" OR "diseases activities" OR "diseases activity" OR "illness activity" OR "Severity of Illness Index") AND ts=("Time" OR "time" OR time\* OR timing\* OR "long term" OR "longterm" OR "short term" OR "shortterm" OR followup\* OR "follow up" OR "Follow Up"))

## **Cochrane**

<http://www.cochranelibrary.com/>

("Rheumatoid Arthritis" OR "rheumatoid arthritis" OR "rheumatoid" OR "rheumatic" OR "arthritis" OR arthriti\* OR "RA") AND ("Cervical Vertebra" OR cervical\* OR "SAS" OR "subaxilar subluxation" OR "subaxilar subluxations" OR "subaxial subluxation" OR "subaxial subluxations" OR "AAI" OR "atlanto axial impaction" OR "atlantoaxial impaction" OR "AAS" OR "atlantoaxial subluxation" OR "anterior atlantoaxial subluxation" OR "anterior atlanto axial subluxation" OR "anterior atlantoaxial subluxations" OR "anterior atlanto axial subluxations" OR "VT" OR "vertical translocation" OR "vertical translation" OR "vertical translocations" OR "vertical translations") AND ("DAS28" OR "DAS28" OR "DAS 28" OR "das28 score" OR "das28 scored" OR "das28 scores" OR "das28 value" OR "das28 values" OR "das 28 score" OR "das 28 scores" OR "das 28 values" OR "disease activity score" OR "disease activity score 28" OR "disease activity" OR ("Disease activity" AND "Scoring System") OR "disease activities" OR "disease active" OR "diseases activities" OR "diseases activity" OR "illness activity" OR "Severity of Illness Index") AND ("Time" OR "time" OR time\* OR timing\* OR "long term" OR "longterm" OR "short term" OR "shortterm" OR followup\* OR "follow up" OR "Follow Up")):ti,ab,kw

## **CENTRAL**

<https://archie.cochrane.org/index.jsp?redirectTo=http://crso.cochrane.org/login.php&key=58c18a4283f80>

schoones/

Emcare <http://ovidsp.ovid.com/ovidweb.cgi?T=JS&NEWS=n&CSC=Y&PAGE=main&D=emcr>

PeDRO <http://www.pedro.org.au/>

PsycINFO <http://search.ebscohost.com/login.aspx?authtype=ip,uid&profile=lumc&defaultdb=psyh>

ERIC

Via Ebsco: <http://databases.library.leiden.edu/?bibid=990024848320302711&redirect=true>

Via OVID: <http://ovidsp.tx.ovid.com/sp-3.21.0a/ovidweb.cgi?&S=FKFBFPLFBNDDEFEMKNCIKKBGCMKJAA00&New+Database=Single%7c4>

Academic Search Premier [fulltextzoeken]

<http://search.ebscohost.com/login.aspx?authtype=ip,uid&profile=lumc&defaultdb=aph>

Social Services Abstracts

<https://search.proquest.com/socialservices?accountid=12045>

<http://databases.library.leiden.edu/?bibid=990027333030302711&redirect=true>

Sociological Abstracts

<https://search.proquest.com/socabs/index>

<http://databases.library.leiden.edu/?bibid=990024621960302711&redirect=true>

WHO International Clinical Trials Registry Platform

<http://apps.who.int/trialsearch/>

ClinicalTrials.gov

<http://clinicaltrials.gov/>

+ beta-site: <https://clinicaltrials.gov/beta/>

European Union Clinical Trials Register

<https://www.clinicaltrialsregister.eu/ctr-search/search>

Current Controlled Trials

<http://www.controlled-trials.com/>

Multi-register

<http://www.controlled-trials.com/mrct/>

Open Trials

<http://explorer.opentrials.net/search?q>

Prospero

<http://www.crd.york.ac.uk/prospero/>

Converis

<https://converis.lumc.nl/converis/secure/client/login>

Journal databases [fulltextzoeken]

A. ScienceDirect

[http://www.sciencedirect.com/science?\\_ob=MiamiSearchURL&\\_method=requestForm&\\_temp=all\\_boolSearch.tpl&\\_acct=C000026638&\\_version=1&\\_urlVersion=1&\\_userid=530453&md5=d44bd9fa9076bb9b258a588b309be1e3](http://www.sciencedirect.com/science?_ob=MiamiSearchURL&_method=requestForm&_temp=all_boolSearch.tpl&_acct=C000026638&_version=1&_urlVersion=1&_userid=530453&md5=d44bd9fa9076bb9b258a588b309be1e3)
